# Supplementary material for: Genomic and transcriptomic insights into the cellulose-degrading mechanism of Bacillus subtilis DC-11 and its novel cellulose catabolic pathway
Source: Research Square preprint supplement (doi:10.21203/rs.3.rs-6178720/v1), 2025-04-29
Supplement: Supplementary file 1 [file 6039e584463ad83d8f4c4c57.docx]

**Genomic and transcriptomic insights into the cellulose-degrading mechanism of *Bacillus subtilis* DC-11 and its novel cellulose catabolic pathway**

Chen Chen1#, Minqi Zhang1#, Yuanhao Zhang1, Xueping Jiang1, Jia Kong1, Jieling Zhou1, Gaiqun Huang3, Ran Zhang1,2, Hao Li1, 2*, Zhongzheng Gui1,2*

*1. Jiangsu Key Laboratory of Sericultural and Animal Biotechnology, School of Biotechnology, Jiangsu University of Science and Technology, Zhenjiang 212100, China.*

*2. Key Laboratory of Silkworm and Mulberry Genetic Improvement, Ministry of Agriculture and Rural Affairs, Sericultural Scientific Research Center, Chinese Academy of Agricultural Sciences, Zhenjiang 212100, China.*

*3. Sericultural Research Institute, Sichuan Academy of Agricultural Sciences, Nanchong, 637000, Sichuan, China*

* Corresponding author.

E-mail address: Hao Li, lhoscarlh@just.edu.cn; Zhongzheng Gui, srizzgui@hotmail.com

* These authors contributed equally to this work and should be considered co-corresponding authors.

# These authors equally contributed to this work.

**Table S1 | all abbreviations used in the manuscript**

| Abbreviation | Full form |
| --- | --- |
| BP | biological processes |
| *B. subtilis* | *Bacillus subtilis* |
| CA | California |
| CC | cellular components |
| CCR | carbon catabolite repression |
| CGMCC | the China General Microbiological Culture Collection Center |
| CK | control (glucose) group |
| CMC | Carboxymethyl Cellulose |
| CMCase | carboxymethyl cellulase |
| CMC-Na | the carboxymethyl cellulose sodium |
| DEGs | differentially expressed genes |
| EG | experiment (CMC treatment) group |
| EIIAGlc | enzyme IIA glucose |
| Fig | Figure |
| GHS | glycoside hydrolases |
| GLU | glucose-supplemented |
| GO | Gene Ontology |
| KEGG | Kyoto Encyclopedia of Genes and Genomes |
| LB | Luria–Bertani |
| MAGs | Metagenome-Assembled Genomes |
| MF | molecular functions |
| PC1 | Principal Component 1 |
| PC2 | Principal Component 2 |
| PCoA | Principal Coordinate Analysis |
| PTS | phosphotransferase system |
| PTSGlc | phosphoenolpyruvate - dependent glucose phosphotransferase system |
| qRT-PCR | real-time quantitative PCR |
| SEM | Scanning Electron Microscopic |
| USA | United States of America |

**Table S2 | The main DEGs related to carbohydrate transport and metabolism in *Bacillus subtilis* DC-11.** Gene ID was assigned based on the *Bacillus subtilis* DC-11 genome database（<https://www.omicsmart.com/Prokaryotes/home.html#/differBasic>）

| Transcript ID | CAZy domain(s) | Putative function |
| --- | --- | --- |
| PROKKA_01041 | ycdG | putative oligo-carbohydrate hydrolase |
| PROKKA_00155 | gtaB | UTP-glucose-1-phosphate uridylyltransferase |
| PROKKA_02051 | yhcW | putative phosphatase YhcW |
| PROKKA_02763 | pgcA | alpha-phosphoglucomutase |
| PROKKA_00773 | treA | periplasmic trehalase |
| PROKKA_03838 | yngB | putative UTP-glucose-1-phosphate uridylyltransferase |
| PROKKA_03133 | pgi | glucose-6-phosphate isomerase |
| PROKKA_02271 | ydjE | putative sugar kinase (ribokinase family); prophage region 3 |
| PROKKA_02109 | ypqE | putative phosphotransferase system enzyme IIA component |
| PROKKA_03967 | glcK | glucose kinase GlcK |
| PROKKA_01946 | ytoP | putative modified amino acid aminopeptidase |
| PROKKA_03733 | xynB | endo-1,4-xylanase xynB-Aspergillus niger |
| PROKKA_00736 | glvA | maltose-6'-phosphate glucosidase |
| PROKKA_00389 | sacA | sucrose-6-phosphate hydrolase |
| PROKKA_00033 | epsD | putative extracellular matrix glycosyltransferase |
| PROKKA_00506 | bglH | aryl-phospho-beta-d-glucosidase |
| PROKKA_00031 | epsF | putative glycosyltransferase involved in matrix formation |
| PROKKA_00390 | sacP | phosphotransferase system (PTS) sucrose-specific enzyme IIBC component |
| PROKKA_00053 | cscA | sucrose-6-phosphate hydrolase |
| PROKKA_00451 | gmuE | ROK fructokinase; glucomannan utilization protein E |
| PROKKA_01023 | amyE | alpha-amylase |
| PROKKA_03125 | yugT | putative oligo-1,6-glucosidase |
| PROKKA_00424 | ywbA | putative cellobiose phosphotransferase system enzyme IIC permease component |
| PROKKA_00449 | gmuC | oligo-alpha-mannoside phosphotransferase system enzyme IIC |
| PROKKA_02068 | ybbF | UDP-2,3-diacylglucosamine hydrolase |
| PROKKA_00146 | tuaD | UDP-glucose 6-dehydrogenase TuaD |
| PROKKA_00448 | gmuA | oligo-alpha-mannoside phosphotransferase system enzyme IIA |
| PROKKA_00447 | gmuB | oligo-alpha-mannoside phosphotransferase system enzyme IIB |
| PROKKA_00435 | licH | 6-phospho-beta-glucosidase |
| PROKKA_00437 | licC | phosphotransferase system (PTS) lichenan-specific enzyme IIC component |
| PROKKA_00436 | licA | phosphotransferase system (PTS) lichenan-specific enzyme IIA component |
| PROKKA_00450 | gmuD | mannoside-phospho-beta-d-glucosidase |
| PROKKA_02427 | yqaB | fructose-1-phosphate/6-phosphogluconate phosphatase |
| PROKKA_00637 | SacB | levansucrase; levanase (moonlighting) |
| PROKKA_00623 | MJ1607 | glycosyltransferase family 4 protein |
| PROKKA_01187 | yfnH | putative sugar-phosphate cytidylyltransferase YfnH |

**Table S3 | Relative expression levels of key genes.**

| Gene name | The GLU group (Relative gene expression level) | | | The CMC-Na group (Relative gene expression level) | | |
| --- | --- | --- | --- | --- | --- | --- |
| PROKKA_01946(ytoP) | 1.404445 | 1.486735 | 1.555197 | 1.094294 | 0.933033 | 0.97942 |
| PROKKA_00506(bglP) | 1.081725 | 1.074253 | 0.860551 | 1.417485 | 1.60551 | 1.519794 |
| PROKKA_00450(gmuD) | 1.013959 | 0.993092 | 0.993092 | 1.205808 | 1.368438 | 1.279228 |
| PROKKA_00435(licH) | 1.054579 | 0.97041 | 0.97716 | 1.344124 | 1.505475 | 1.254579 |
| PROKKA_00437(licC) | 1.054579 | 0.97041 | 0.97716 | 1.344124 | 1.505475 | 1.254579 |
| PROKKA_00424(ywbA) | 0.988514 | 1.030492 | 0.981686 | 1.613656 | 1.663576 | 1.433896 |
| PROKKA_00448(gmuA) | 0.986689 | 1.068559 | 0.948465 | 1.331759 | 1.480851 | 1.28731 |
| PROKKA_00436(licA) | 1.047294 | 1.099362 | 0.868541 | 1.39797 | 1.454607 | 1.383702 |
| PROKKA_00447(gmuB) | 1.047294 | 1.099362 | 0.868541 | 1.39797 | 1.384607 | 1.463702 |
